# Supplementary material for: Mutational pathway maps and founder effects define the within-host spectrum of hepatitis C virus mutants resistant to drugs
Source: PLOS journal article supplement (doi:10.1371/journal.ppat.1007701), 2019-04-01
Supplement: S6 (10.1371/journal.ppat.1007701.s006) [file journal.ppat.1007701.s006.pdf]

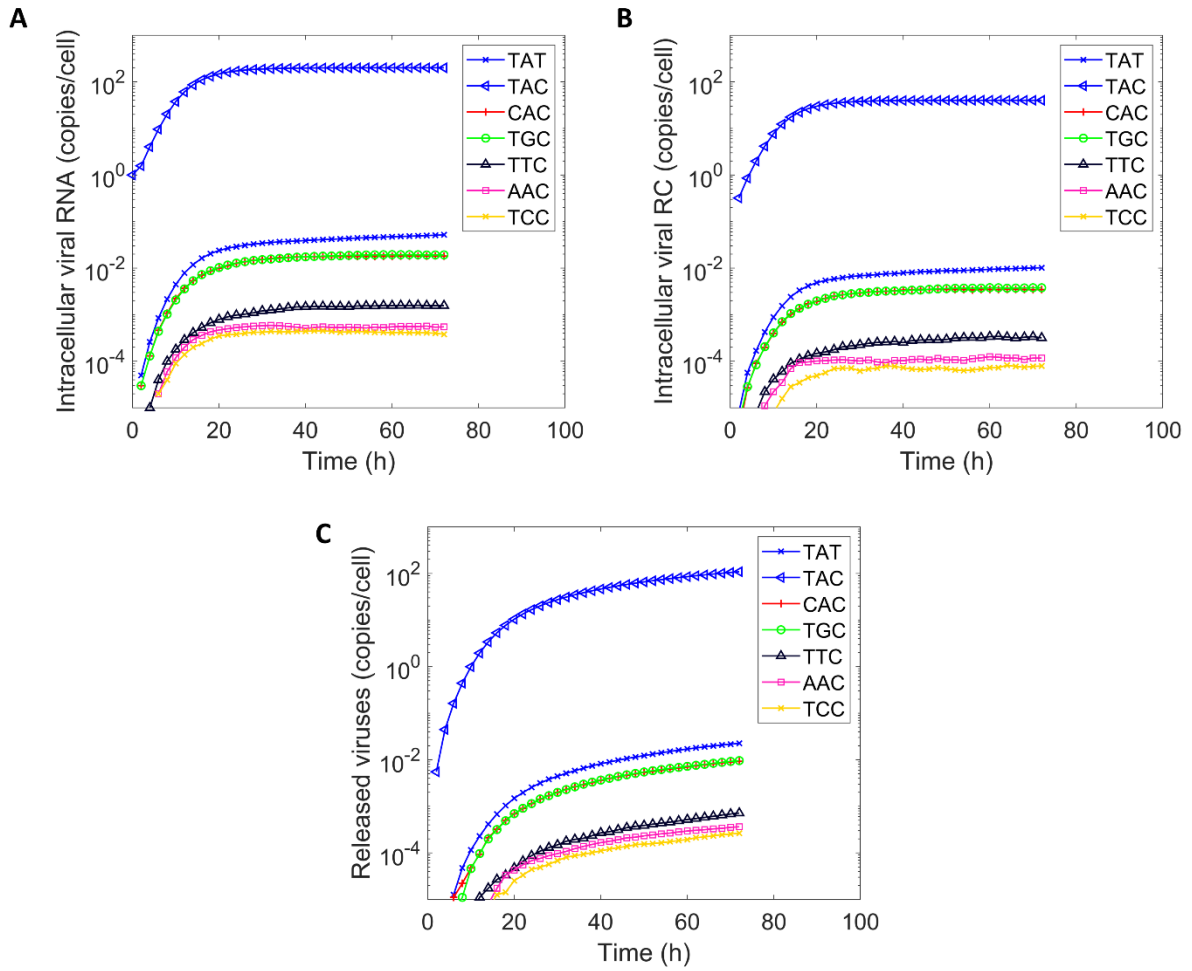

**S6 Figure. Intracellular dynamics and evolution leading to NS5A resistance.** The averaged evolution of the populations of genomes carrying different codons following infection with TAC at the position 93 of the NS5A region of HCV.
