# Supplementary material for: Mutational pathway maps and founder effects define the within-host spectrum of hepatitis C virus mutants resistant to drugs
Source: PLOS journal article supplement (doi:10.1371/journal.ppat.1007701), 2019-04-01
Supplement: S11 (10.1371/journal.ppat.1007701.s011) [file journal.ppat.1007701.s011.pdf]

**S1 Table. Specific release rate matrix.** The mean  $\pm$  standard deviation specific release rates shown as the heat map in Fig. 3C. The mutants are colour-coded base on the amino-acid type. The diagonal elements shown in light blue represent the release of the infecting strains. The other non-zero entries are in grey.

|                  |     | Released strain |              |              |              |              |              |              |              |               |                |               |               |               |
|------------------|-----|-----------------|--------------|--------------|--------------|--------------|--------------|--------------|--------------|---------------|----------------|---------------|---------------|---------------|
|                  |     | AGG             | AGA          | CGG          | CGA          | CGT          | CGC          | AAG          | AAA          | ACG           | ACA            | ACT           | ACC           | ATG           |
| Infecting strain | AGG | 36 $\pm$ 6      | 0 $\pm$ 0.3  | 0 $\pm$ 0.05 | 0            | 0            | 0            | 0 $\pm$ 0.2  | 0            | 0 $\pm$ 0.003 | 0              | 0             | 0             | 0 $\pm$ 0.003 |
|                  | AGA | 0 $\pm$ 0.2     | 36 $\pm$ 6   | 0            | 0 $\pm$ 0.05 | 0            | 0            | 0            | 0 $\pm$ 0.16 | 0             | 0 $\pm$ 0.0004 | 0             | 0             | 0             |
|                  | CGG | 0 $\pm$ 0.06    | 0            | 36 $\pm$ 6   | 0 $\pm$ 0.2  | 0 $\pm$ 0.03 | 0 $\pm$ 0.05 | 0            | 0            | 0             | 0              | 0             | 0             | 0             |
|                  | CGA | 0               | 0 $\pm$ 0.02 | 0 $\pm$ 0.3  | 36 $\pm$ 6   | 0 $\pm$ 0.01 | 0 $\pm$ 0.02 | 0            | 0            | 0             | 0              | 0             | 0             | 0             |
|                  | CGT | 0               | 0            | 0 $\pm$ 0.04 | 0 $\pm$ 0.01 | 36 $\pm$ 6   | 0 $\pm$ 0.3  | 0            | 0            | 0             | 0              | 0             | 0             | 0             |
|                  | CGC | 0               | 0            | 0 $\pm$ 0.03 | 0 $\pm$ 0.02 | 0 $\pm$ 0.3  | 36 $\pm$ 6   | 0            | 0            | 0             | 0              | 0             | 0             | 0             |
|                  | AAG | 0 $\pm$ 0.5     | 0            | 0            | 0            | 0            | 0            | 29 $\pm$ 6   | 0 $\pm$ 0.2  | 0 $\pm$ 0.004 | 0              | 0             | 0             | 0 $\pm$ 0.003 |
|                  | AAA | 0               | 0 $\pm$ 0.5  | 0            | 0            | 0            | 0            | 0 $\pm$ 0.2  | 29 $\pm$ 6   | 0             | 0 $\pm$ 0.006  | 0             | 0             | 0             |
|                  | ACG | 0 $\pm$ 0.09    | 0            | 0            | 0            | 0            | 0            | 0 $\pm$ 0.08 | 0            | 4 $\pm$ 3     | 0 $\pm$ 0.03   | 0 $\pm$ 0.02  | 0 $\pm$ 0.002 | 0 $\pm$ 0.006 |
|                  | ACA | 0               | 0 $\pm$ 0.09 | 0            | 0            | 0            | 0            | 0            | 0 $\pm$ 0.02 | 0 $\pm$ 0.03  | 4 $\pm$ 3      | 0 $\pm$ 0.005 | 0 $\pm$ 0.004 | 0             |
|                  | ACT | 0               | 0            | 0            | 0            | 0            | 0            | 0            | 0            | 0 $\pm$ 0.004 | 0 $\pm$ 0.006  | 4 $\pm$ 3     | 0 $\pm$ 0.03  | 0             |
|                  | ACC | 0               | 0            | 0            | 0            | 0            | 0            | 0            | 0            | 0 $\pm$ 0.01  | 0 $\pm$ 0.007  | 0 $\pm$ 0.04  | 4 $\pm$ 3     | 0             |
|                  | ATG | 0               | 0            | 0            | 0            | 0            | 0            | 0            | 0            | 0             | 0              | 0             | 0             | 0 $\pm$ 0.04  |
